# Supplementary material for: Pangenome graphs in infectious disease: a comprehensive genetic variation analysis of Neisseria meningitidis leveraging Oxford Nanopore long reads
Source: Front Genet. 2023 Aug 10;14:1225248. doi: 10.3389/fgene.2023.1225248 (PMC10448961; doi:10.3389/fgene.2023.1225248)
Supplement: Supplementary file 3 [file Table9.XLSX]

## Sheet: Table. S9
Table S9. Mapping rates of real NGS Data to linear reference versus genome graph
	ST154 isolates being mapped to ST154	ST154 isolates being mapped to ST41	ST154 isolates being mapped to ST42	ST154 isolates being mapped to 3ST graph	ST41 isolates being mapped ST154	ST41 isolates being mapped to ST41	ST41 isolates being mapped to ST42	ST41 isolates being mapped to 3ST graph	ST42 isolates being mapped to ST154	ST42 isolates being mapped to ST41	ST42 isolates being mapped to ST42	ST42 isolates being mapped to 3ST graph
	0.991	0.9921	0.9934	0.9966	0.958	0.971	0.9775	0.9785	0.9893	0.9941	0.9997	0.9998
	0.9937	0.9944	0.9956	0.9987	0.9809	0.9919	0.9979	0.9991	0.9793	0.9905	0.9989	0.9969
	0.9721	0.972	0.9738	0.9801	0.992	0.9999	0.9978	0.9998	0.9883	0.9925	0.9995	0.9989
	0.9951	0.9947	0.9963	0.9979	0.9924	0.9999	0.9978	0.9997	0.9536	0.9559	0.961	0.9658
	0.9929	0.9931	0.9949	0.9981	0.9816	0.9857	0.9904	0.9931	0.991	0.9932	0.9987	0.9991
	0.9959	0.9952	0.9968	0.999	0.9841	0.9914	0.9913	0.9947	0.9783	0.9807	0.9854	0.9881
	0.9738	0.973	0.9743	0.9795	0.9933	0.9996	0.998	0.9997	0.9927	0.9944	0.999	0.9992
	0.9783	0.979	0.9803	0.9864	0.9919	0.9995	0.9977	0.9995	0.9914	0.9928	0.9973	0.9973
	0.9909	0.993	0.9952	0.9959	0.987	0.9916	0.9951	0.9969	0.9901	0.9914	0.9955	0.9978
	0.9951	0.9954	0.9973	0.9988	0.9854	0.9918	0.9918	0.9951	0.9784	0.9801	0.984	0.9878
	0.9908	0.9934	0.9953	0.9974	0.9913	0.9999	0.9977	0.9996	0.9679	0.9702	0.9754	0.9796
	0.9945	0.9951	0.9969	0.9998	0.9952	1	0.9982	0.9995	0.9916	0.9924	0.9961	0.9974
	0.9942	0.9947	0.9966	0.9995	0.9845	0.9878	0.9928	0.9953	0.9889	0.9929	0.9963	0.9959
	0.9938	0.9945	0.9964	0.9993	0.9922	0.9942	0.9967	0.9978	0.9918	0.9934	0.9974	0.9983
	0.9944	0.9952	0.9969	0.9995	0.9918	0.9999	0.9977	0.9997	0.9904	0.9927	0.9971	0.9986
	0.9941	0.9949	0.9966	0.9996	0.9827	0.9907	0.991	0.9944	0.9807	0.9846	0.9915	0.9877
	0.9943	0.9951	0.9967	0.9996	0.9927	0.9999	0.9977	0.9996	0.9821	0.9883	0.9951	0.9943
	0.9946	0.9955	0.9969	0.9997	0.9946	0.9999	0.9982	0.9995	0.9688	0.9714	0.976	0.9783
	0.9958	0.9953	0.9973	0.9992	0.9922	0.9998	0.9976	0.9996	0.9928	0.9947	0.9998	0.9985
	0.995	0.9956	0.9973	0.9993	0.9928	0.9992	0.9975	0.9991	0.9794	0.985	0.9915	0.9924
	0.9943	0.9949	0.9966	0.9996	0.9934	0.9996	0.9978	0.9994	0.993	0.9956	0.9998	0.9997
	0.9942	0.9951	0.9969	0.9997	0.9948	1	0.9981	0.9986	0.9766	0.9848	0.9993	0.9994
	0.9945	0.995	0.9968	0.9996	0.9946	0.9999	0.9981	0.9996	0.9925	0.9946	0.9999	0.9992
	0.9956	0.9962	0.9975	0.9992	0.9885	0.9985	0.9961	0.9986	0.988	0.9926	0.9984	0.9992
	0.9944	0.9952	0.9969	0.9998	0.9919	0.9998	0.9976	0.9996	0.9894	0.9932	0.9997	0.9996
	0.9941	0.9948	0.9966	0.9995	0.9956	0.9999	0.9982	0.9995	0.9899	0.994	0.9998	0.9996
	0.9932	0.9928	0.9949	0.9958	0.992	0.9999	0.9977	0.9997	0.9898	0.9938	0.9998	0.9997
	0.9958	0.9956	0.9976	0.9983	0.975	0.9792	0.9775	0.9811	0.9897	0.9941	0.9998	0.9997
	0.9969	0.9949	0.9967	0.9996	0.9918	0.9993	0.9971	0.9994	0.994	0.9957	0.9997	0.9969
	0.9945	0.9951	0.9969	0.9996	0.9929	0.9999	0.9978	0.9997	0.9933	0.995	0.9998	0.9996
	0.9946	0.9953	0.997	0.9997	0.9876	0.9885	0.9907	0.9936	0.9897	0.9936	0.9999	0.9997
	0.9945	0.9947	0.9964	0.9993	0.9897	0.9908	0.9943	0.996	0.9901	0.9937	0.9998	0.9997
	0.9938	0.9947	0.9964	0.9993	0.98	0.9814	0.9852	0.9874	0.9904	0.9939	0.9999	0.9997
	0.9956	0.9967	0.9977	0.9991	0.9708	0.9782	0.976	0.9805	0.9892	0.9936	0.9998	0.9996
	0.9947	0.9954	0.997	0.9997	0.9916	0.9973	0.9956	0.9984	0.9904	0.9938	0.9998	0.9997
	0.9949	0.9949	0.9967	0.9995	0.9769	0.984	0.982	0.987	0.9902	0.9939	0.9999	0.9997
	0.995	0.9955	0.9971	0.9996	0.9926	0.9963	0.9979	0.9993	0.99	0.9938	0.9998	0.9996
	0.9945	0.9952	0.997	0.9997	0.9948	0.9994	0.9977	0.9994	0.9906	0.9939	0.9998	0.9997
	0.9973	0.9951	0.997	0.9996	0.9945	0.999	0.9974	0.9992	0.9901	0.9938	0.9998	0.9997
	0.9947	0.9953	0.997	0.9997	0.9793	0.9827	0.9873	0.9911	0.99	0.9939	0.9998	0.9997
	0.995	0.9952	0.9969	0.9996	0.9924	0.9944	0.9967	0.9984	0.9896	0.9936	0.9997	0.9996
	0.9941	0.9949	0.9967	0.9995	0.9724	0.973	0.9744	0.9791	0.993	0.9949	0.9997	0.9994
	0.9945	0.9952	0.997	0.9997	0.9914	0.9975	0.9957	0.9983	0.9916	0.9935	0.9999	0.9983
	0.9945	0.9953	0.997	0.9997	0.9916	0.9997	0.9975	0.9996	0.9903	0.9938	0.9997	0.9996
	0.9966	0.9966	0.998	0.9997	0.9931	1	0.998	0.998	0.9903	0.994	0.9998	0.9997
	0.992	0.9929	0.9944	0.998	0.9944	0.998	0.9967	0.9984	0.99	0.9938	0.9997	0.9997
	0.9946	0.9952	0.9969	0.9997	0.9941	0.9957	0.9988	0.9993	0.9892	0.9923	0.9998	0.9997
	0.9965	0.9961	0.9979	0.9999	0.9949	0.9994	0.9977	0.9994	0.9884	0.9917	0.9989	0.9994
	0.9945	0.9939	0.9953	0.998					0.9904	0.9943	0.9999	0.9996
									0.9902	0.9927	0.9987	0.9994
									0.992	0.9941	0.9984	0.999
									0.9755	0.9769	0.9809	0.9845
count	49	49	49	49	48	48	48	48	52	52	52	52
mean	0.993259	0.993651	0.995339	0.998033	0.988525	0.994269	0.994083	0.996204	0.987196	0.99054	0.996242	0.996519
std	0.00500112	0.00504204	0.00508805	0.00431834	0.00780113	0.00779689	0.00651559	0.00583839	0.00765312	0.00754924	0.00774083	0.00667565
min	0.9721	0.972	0.9738	0.9795	0.958	0.971	0.9744	0.9785	0.9536	0.9559	0.961	0.9658
0.25	0.9941	0.9947	0.9964	0.9987	0.985175	0.99125	0.99255	0.99525	0.988375	0.99215	0.99725	0.997375
0.5	0.9945	0.9951	0.9968	0.9995	0.9919	0.99875	0.9975	0.9991	0.99	0.9936	0.9997	0.9994
0.75	0.995	0.9953	0.997	0.9997	0.99315	0.9999	0.9978	0.999525	0.9907	0.993925	0.9998	0.9997
max	0.9973	0.9967	0.998	0.9999	0.9956	1	0.9988	0.9998	0.994	0.9957	0.9999	0.9998
