# Supplementary material for: Pangenome graphs in infectious disease: a comprehensive genetic variation analysis of Neisseria meningitidis leveraging Oxford Nanopore long reads
Source: Front Genet. 2023 Aug 10;14:1225248. doi: 10.3389/fgene.2023.1225248 (PMC10448961; doi:10.3389/fgene.2023.1225248)
Supplement: Supplementary file 6 [file Table1.XLSX]

## Sheet: Table S1
Table S1. 130 Meningococcal isolate genomes downloaded from NCBI
Neisseria meningitidis ID	SEROGROUP	ctrA	PorA	FetA	PorB	fHbp	NHBA	NadA	BAST	abcZ	adk	aroE	fumC	gdh	pdhC	pgm	Sequence type	Clonal Complex
>NC_017518.1 Neisseria meningitidis NZ-05/33, complete sequence	B	ctrA	7-2,4	F1-5	NEIS2020_42	14	2	0	223	10	6	9	5	9	6	9	42	ST-41/44
>NC_003112.2 Neisseria meningitidis MC58, complete sequence	-	ctrA	7,16-2	F1-5	NEIS2020_10	1	3	1	23	4	10	5	4	5	3	2	74	ST-32
>NC_003116.1 Neisseria meningitidis Z2491, complete sequence	A	ctrA	7,13-1	F1-5	NEIS2020_28	5	29	0	639	1	3	3	1	4	2	3	4	ST-4
>NC_008767.1 Neisseria meningitidis FAM18, complete sequence	C	ctrA	5,2	-	NEIS2020_1	22	29	3	3	2	3	4	3	8	4	6	11	ST-11
>NC_010120.1 Neisseria meningitidis 053442, complete sequence	C	ctrA	7-2,14	F3-3	NEIS2020_29	80	503	0	802	222	3	58	275	30	5	255	4821	ST-4821
>NC_017501.1 Neisseria meningitidis 8013, complete sequence	C	ctrA	21,26-2	F1-5	NEIS2020_3	17	101	9	118	7	8	10	38	10	1	20	177	ST-18
>NC_013016.1 Neisseria meningitidis alpha14, complete sequence	-	-	7,30-3	F5-5	NEIS2020_27	102	58	0	635	16	2	6	25	17	25	22	53	ST-53
>NC_017505.1 Neisseria meningitidis alpha710, complete sequence	B	ctrA	17,16-3	F5-5	NEIS2020_266	24	10	0	253	27	6	9	3	9	6	16	136	ST-41/44
>NC_017513.1 Neisseria meningitidis G2136, complete sequence	B	ctrA	5-2,10-1	F3-6	NEIS2020_12	16	20	8	150	2	3	7	2	8	5	2	8	ST-8
>NC_017516.1 Neisseria meningitidis H44/76, complete sequence	B	ctrA	7,16	F3-3	NEIS2020_10	1	3	0	642	4	10	5	4	6	3	8	32	ST-32
>NC_017514.1 Neisseria meningitidis M01-240149, complete sequence	B	ctrA	7-2,4	F1-5	NEIS2020_42	4	2	0	220	3	6	9	5	9	6	9	41	ST-41/44
>NC_017517.1 Neisseria meningitidis M01-240355, complete sequence										7	5	1	13	36	53	15		ST-213
>NC_017515.1 Neisseria meningitidis M04-240196, complete sequence	B	-	19-1,15-11	F5-1	NEIS2020_199	15	0	0	3078	4	10	15	9	8	11	9	269	ST-269
>NC_017512.1 Neisseria meningitidis WUE 2594, complete sequence	A	ctrA	20,9	F1-21	NEIS2020_36	5	27	8	13	1	1	2	1	3	2	3	5	ST-5
>NZ_CP007524.1 Neisseria meningitidis strain 510612 chromosome, complete genome	A	ctrA	20,9	F3-1	NEIS2020_36	5	126	8	22	1	1	2	1	3	2	19	7	ST-5
>NZ_CP016684.1 Neisseria meningitidis strain L91543 chromosome, complete genome	C	ctrA	5,2	F1-1	NEIS2020_195	13	29	4	-	2	3	4	3	8	4	6	11	ST-11
>NZ_CP009418.1 Neisseria meningitidis strain NM3686 chromosome, complete genome	W	ctrA	5,2	F1-1	NEIS2020_75-like	766	29	6	864	2	3	4	3	8	4	6	11	ST-11
>NZ_CP009419.1 Neisseria meningitidis M7124 chromosome, complete genome	W	ctrA	5,2	F1-1	NEIS2020_1	9	96	6	898	2	3	4	3	8	4	6	11	ST-11
>NZ_CP009420.1 Neisseria meningitidis strain NM3682 chromosome, complete genome	W	ctrA	5,2	F1-1	NEIS2020_1	22	29	3	3	2	3	4	3	8	4	6	11	ST-11
>NZ_CP009421.1 Neisseria meningitidis strain NM3683 chromosome, complete genome	W	ctrA	5,2	F1-1	NEIS2020_1	22	29	3	3	2	3	4	3	8	4	6	11	ST-11
>NZ_CP009422.1 Neisseria meningitidis strain M10208 chromosome, complete genome	W	ctrA	5,2	F1-1	NEIS2020_244	623	29	6	141	2	3	4	3	8	4	6	11	ST-11
>NZ_CP006869.1 Neisseria meningitidis LNP21362 chromosome, complete genome	B	ctrA	7,16	F3-3	NEIS2020_67	1	3	1	4								-	new
>NZ_CP007667.1 Neisseria meningitidis strain B6116/77 chromosome, complete genome	B	ctrA	5-1,2-2	F1-4	NEIS2020_12	16	20	8	48	2	3	4	2	8	15	2	10	ST-8
>NZ_CP007668.1 Neisseria meningitidis M0579 chromosome, complete genome	B	ctrA	5,2/5,2	F1-5	NEIS2020_40	20	2	0	-	12	6	9	9	9	6	9	-	ST-41/44
>NZ_CP012391.1 Neisseria meningitidis strain DE8669 chromosome, complete genome	B	ctrA	7-2,4	F1-5	NEIS2020_42	14	2	0	223	10	6	9	5	9	6	9	42	ST-41/44
>NZ_CP012392.1 Neisseria meningitidis strain DE10444 chromosome, complete genome	Y	ctrA	5-1,2-2	F5-8	NEIS2020_243	25	8	0	227	10	5	18	9	11	9	17	23	ST-23
>NZ_CP012393.1 Neisseria meningitidis strain DE8555 chromosome, complete genome	C	ctrA	5,2	F3-3	NEIS2020_1-like	22	29	3	3	2	3	4	3	8	4	6	11	ST-11
>NZ_CP012394.1 Neisseria meningitidis strain WUE2121 chromosome, complete genome	C	ctrA	5,2	F3-9	NEIS2020_1321-like	59	29	3	-	2	3	4	3	8	4	6	11	ST-11
>NZ_CP016627.1 Neisseria meningitidis strain M22718 chromosome, complete genome	W	ctrA	5,2	F1-1	NEIS2020_1	9	96	6	898	2	3	4	3	8	4	6	11	ST-11
>NZ_CP016645.1 Neisseria meningitidis strain M12752 chromosome, complete genome	W	ctrA	5,2	F1-1	NEIS2020_1	9	96	6	898	2	3	4	3	8	4	6	11	ST-11
>NZ_CP016646.1 Neisseria meningitidis strain M22819 chromosome, complete genome	W	ctrA	5-1,2-36	F5-1	NEIS2020_234	22	9	new	-	179	7	4	56	26	18	8	2881	ST-175
>NZ_CP016647.1 Neisseria meningitidis strain M22809 chromosome, complete genome	W	ctrA	5-1,2-36	F5-1	NEIS2020_234	22	9	new	-	179	7	4	56	26	18	8	2881	ST-175
>NZ_CP016648.1 Neisseria meningitidis strain M09293 chromosome, complete genome	W	ctrA	5,2	F1-1	NEIS2020_1	23	29	6	29	2	3	4	3	8	4	6	11	ST-11
>NZ_CP016649.1 Neisseria meningitidis strain M22189 chromosome, complete genome	W	ctrA	5,2	F1-1	NEIS2020_1176	9	96	6	898	2	3	4	3	8	4	6	11	ST-11
>NZ_CP016650.1 Neisseria meningitidis strain M07149 chromosome, complete genome	W	ctrA	5,2	F1-1	NEIS2020_1	9	96	6	898	2	3	4	3	8	4	6	11	ST-11
>NZ_CP016651.1 Neisseria meningitidis strain M25474 chromosome, complete genome	W	ctrA	5,2	F1-1	NEIS2020_1	9	96	6	898	2	3	4	3	8	4	6	11	ST-11
>NZ_CP016652.1 Neisseria meningitidis strain M08001 chromosome, complete genome	W	ctrA	5,2	F1-1	NEIS2020_1	23	29	6	29	2	3	4	3	8	4	6	11	ST-11
>NZ_CP016653.1 Neisseria meningitidis strain M22748 chromosome, complete genome	W	ctrA	5,2	F1-1	NEIS2020_1	9	96	6	898	2	3	4	3	8	4	6	11	ST-11
>NZ_CP016654.1 Neisseria meningitidis strain M22811 chromosome, complete genome	W	ctrA	5-1,2-36	F5-1	NEIS2020_234	22	9	new	-	179	7	4	56	26	18	8	2881	ST-175
>NZ_CP016655.1 Neisseria meningitidis strain M22772 chromosome, complete genome	W	ctrA	5,2	F1-1	NEIS2020_1	9	96	6	898	2	3	4	3	8	4	6	11	ST-11
>NZ_CP016656.1 Neisseria meningitidis strain M22769 chromosome, complete genome	W	ctrA	5,2	F1-1	NEIS2020_1	9	96	6	898	2	3	4	3	8	4	6	11	ST-11
>NZ_CP016657.1 Neisseria meningitidis strain M22745 chromosome, complete genome	W	ctrA	5,2	F1-1	NEIS2020_1	23	29	6	29								-	new
>NZ_CP016658.1 Neisseria meningitidis strain M24730 chromosome, complete genome	W	ctrA	5,2	F1-1	NEIS2020_1	9	96	6	898	2	3	4	3	8	4	6	11	ST-11
>NZ_CP016659.1 Neisseria meningitidis strain M22801 chromosome, complete genome	W	ctrA	5,2	F1-1	NEIS2020_1	9	96	6	898	2	3	4	3	8	4	6	11	ST-11
>NZ_CP016660.1 Neisseria meningitidis strain M22804 chromosome, complete genome	W	ctrA	5-1,2-36	F5-1	NEIS2020_234	22	9	new	-	179	7	4	56	26	18	8	2881	ST-175
>NZ_CP016661.1 Neisseria meningitidis strain M25438 chromosome, complete genome	W	ctrA	5,2	F1-1	NEIS2020_1	111	96	6	-	2	3	4	3	8	4	6	11	ST-11
>NZ_CP016662.1 Neisseria meningitidis strain M23413 chromosome, complete genome	W	ctrA	5,2	F1-1	NEIS2020_1	9	96	6	898	2	3	4	3	8	4	6	11	ST-11
>NZ_CP016663.1 Neisseria meningitidis strain M22722 chromosome, complete genome	W	ctrA	5,2	F1-1	NEIS2020_1	9	96	6	898	2	3	4	3	8	4	6	11	ST-11
>NZ_CP016664.1 Neisseria meningitidis strain M25070 chromosome, complete genome	W	ctrA	5,2	F1-1	NEIS2020_1	9	96	6	898	2	3	4	3	8	4	6	11	ST-11
>NZ_CP016665.1 Neisseria meningitidis strain M09261 chromosome, complete genome	W	ctrA	5,2	F1-1	NEIS2020_232	23	29	6	29	2	3	4	3	8	4	6	11	ST-11
>NZ_CP016666.1 Neisseria meningitidis strain M25462 chromosome, complete genome	W	ctrA	5,2	F1-1	NEIS2020_1	843	96	6	-	2	3	4	3	8	4	6	11	ST-11
>NZ_CP016667.1 Neisseria meningitidis strain M27559 chromosome, complete genome	W	ctrA	5,2	F1-1	NEIS2020_1	9	96	6	898	2	3	4	3	8	4	6	11	ST-11
>NZ_CP016668.1 Neisseria meningitidis strain M25472 chromosome, complete genome	W	ctrA	5,2	F1-1	NEIS2020_1	9	96	6	898	2	3	4	3	8	4	6	11	ST-11
>NZ_CP016669.1 Neisseria meningitidis strain M22759 chromosome, complete genome	W	ctrA	5,2	F1-1	NEIS2020_1	9	96	6	898	2	3	4	3	8	4	6	11	ST-11
>NZ_CP016670.1 Neisseria meningitidis strain M25087 chromosome, complete genome	W	ctrA	5,2	F1-1	NEIS2020_1	9	96	6	898	2	3	4	3	8	4	6	11	ST-11
>NZ_CP016671.1 Neisseria meningitidis strain M22783 chromosome, complete genome	W	ctrA	5-1,2-36	F5-1	NEIS2020_234	22	9	new	-	179	7	4	56	26	18	8	2881	ST-175
>NZ_CP016672.1 Neisseria meningitidis strain M22828 chromosome, complete genome	W	ctrA	5-1,2-36	F5-1	NEIS2020_234	22	9	new	-	179	7	4	56	26	18	8	2881	ST-175
>NZ_CP016673.1 Neisseria meningitidis strain M25459 chromosome, complete genome	W	ctrA	5,2	F1-1	NEIS2020_1	843	96	6	-	2	3	4	3	8	4	6	11	ST-11
>NZ_CP016674.1 Neisseria meningitidis strain M22160 chromosome, complete genome	W	ctrA	5,2	F1-1	NEIS2020_1176	9	96	6	898	2	3	4	3	8	4	6	11	ST-11
>NZ_CP016675.1 Neisseria meningitidis strain M07161 chromosome, complete genome	W	ctrA	5,2	F1-1	NEIS2020_1	22	96	6	49	2	3	4	3	8	4	6	-	ST-11
>NZ_CP016676.1 Neisseria meningitidis strain M25476 chromosome, complete genome	W	ctrA	5,2	F1-1	NEIS2020_1	9	96	6	898	2	3	4	3	8	4	6	11	ST-11
>NZ_CP016677.1 Neisseria meningitidis strain M25456 chromosome, complete genome	W	ctrA	5,2	F1-1	NEIS2020_1	843	96	6	-	2	3	4	3	8	4	6	11	ST-11
>NZ_CP016678.1 Neisseria meningitidis strain M25419 chromosome, complete genome	W	ctrA	5,2	F1-1	NEIS2020_244	22	29	6	2	2	3	4	3	8	4	6	11	ST-11
>NZ_CP016679.1 Neisseria meningitidis strain M22740 chromosome, complete genome	W	ctrA	5,2	F1-1	NEIS2020_1	9	96	6	898	2	3	4	3	8	4	6	11	ST-11
>NZ_CP016680.1 Neisseria meningitidis strain M22822 chromosome, complete genome	W	ctrA	5-1,2-36	F5-1	NEIS2020_234	22	9	new	-	179	7	4	56	26	18	8	2881	ST-175
>NZ_CP016644.1 Neisseria meningitidis strain M07162 chromosome, complete genome	W	ctrA	5,2	F1-1	NEIS2020_311	151	29	6	6	2	3	4	3	8	4	6	11	ST-11
>NZ_CP016681.1 Neisseria meningitidis strain M08000 chromosome, complete genome	W	ctrA	5,2	F1-1	NEIS2020_1	23	29	6	29	2	3	4	3	8	4	6	11	ST-11
>NZ_CP016682.1 Neisseria meningitidis strain M24705 chromosome, complete genome	W	ctrA	5-1,2-36	F5-1	NEIS2020_234	22	9	new	-	179	7	4	56	26	18	12	8638	ST-175
>NZ_CP016683.1 Neisseria meningitidis strain M22191 chromosome, complete genome	W	ctrA	5,2	F1-1	NEIS2020_1	0	29	6	-	2	3	4	3	8	4	6	11	ST-11
>NZ_CP016880.1 Neisseria meningitidis strain M07165 chromosome	W	ctrA	5,2	-	NEIS2020_1321-like	348	29	6	-	2	3	4	3	8	4	6	11	ST-11
>NZ_CP016882.1 Neisseria meningitidis strain M22747 chromosome	W	ctrA	5,2	F1-1	NEIS2020_1	9	96	6	898	2	3	4	3	8	4	6	11	ST-11
>NZ_CP016881.1 Neisseria meningitidis strain M07999 chromosome	W	ctrA	5,2	F1-1	NEIS2020_1	23	29	6	29	2	3	4	3	8	4	6	11	ST-11
>NZ_CP016884.1 Neisseria meningitidis strain M22797 chromosome	W	ctrA	5,2	F1-1	NEIS2020_1	9	96	6	898	2	3	4	3	8	4	6	11	ST-11
>NZ_CP016886.1 Neisseria meningitidis strain M25074 chromosome	W	ctrA	5,2	-	NEIS2020_1	9	96	6	898	2	3	4	3	8	4	6	11	ST-11
>NZ_CP016885.1 Neisseria meningitidis strain M25073 chromosome	W	ctrA	5,2	-	NEIS2020_1	9	96	6	898	2	3	4	3	8	4	6	11	ST-11
>NZ_CP012694.1 Neisseria meningitidis strain 331401 chromosome, complete genome	X	ctrA	20,9	F3-1	NEIS2020_36-like	5	new	new	-	815	1	1029	1	1043	2	1055	-	ST15419
>NZ_CP015886.1 Neisseria meningitidis strain 38277 chromosome, complete genome	-	-	18,25	F5-2	NEIS2020_150	334	10	0	1742	6	41	108	15	9	6	9	845	ST845
>NZ_CP020401.2 Neisseria meningitidis strain FDAARGOS_214 chromosome, complete genome	C	ctrA	5-1,10-4	F3-20	NEIS2020_598	4	148	0	1041	7	5	2	72	3	75	21	344	ST344
>NZ_CP020402.2 Neisseria meningitidis strain FDAARGOS_215 chromosome, complete genome	B	ctrA	-	F4-1	NEIS2020_1461	97	21	0	-	15	5	9	13	8	15	15	2875	ST-4240/6688
>NZ_CP020422.2 Neisseria meningitidis strain FDAARGOS_211 chromosome, complete genome	B	ctrA	-	F4-1	NEIS2020_1461	97	21	0	-	15	5	9	13	8	15	15	2875	ST-4240/6688
>NZ_CP020420.2 Neisseria meningitidis strain FDAARGOS_209 chromosome, complete genome	A	ctrA	5-2,10	F1-5	NEIS2020_28-like	5	new	0	-	1	3	3	1	4	2	3	4	ST-4
>NZ_CP020421.2 Neisseria meningitidis strain FDAARGOS_210 chromosome, complete genome	B	ctrA	7,16-2	F1-5	NEIS2020_10-like	1	new	1	-	4	10	5	4	5	3	2	74	ST-32
>NZ_CP020423.2 Neisseria meningitidis strain FDAARGOS_212 chromosome, complete genome	C	ctrA	5-1,10-4	F4-1	NEIS2020_1	23	20	0	-	20	3	6	3	8	11	2	-	ST16521
>NZ_CP017257.1 Neisseria meningitidis strain COL-201504-11 chromosome, complete genome	-	ctrA	5-1,10-8	F3-6	NEIS2020_1	896	20	2	-	2	3	4	3	8	4	6	11	ST-11
>NZ_CP023814.1 Neisseria meningitidis strain M26417 chromosome, complete genome	C	ctrA	5-1,10-8	F3-6	NEIS2020_1	635	20	new	-	2	3	4	3	8	4	6	11	ST-11
>NZ_CP023813.1 Neisseria meningitidis strain M26263 chromosome	C	ctrA	5-1,10-8	F3-6	NEIS2020_1	635	20	new	-	2	3	4	3	8	4	6	11	ST-11
>NZ_CP018907.1 Neisseria meningitidis strain M21273 chromosome, complete genome	C	ctrA	5-1,10-8	F3-6	NEIS2020_1	0	20	new	-	10	3	4	3	8	4	6	2724	ST-11
>NZ_CP031334.1 Neisseria meningitidis strain M22293 chromosome, complete genome	B	ctrA	12-1,13-1	F5-12	NEIS2020_329-like	25	6	0	-	13	3	34	13	3	11	2	8445	ST-364
>NZ_CP031335.1 Neisseria meningitidis strain M25964 chromosome, complete genome	C	ctrA	5,2	F3-3	NEIS2020_1	22	29	3	3	2	3	4	3	8	4	6	11	ST-11
>NZ_CP031336.1 Neisseria meningitidis strain M21717 chromosome, complete genome	C	ctrA	22-1,14	F3-6	NEIS2020_1-like	4	20	2	-	2	3	4	3	8	4	6	11	ST-11
>NZ_CP031331.1 Neisseria meningitidis strain M26263 chromosome, complete genome	C	ctrA	5-1,10-8	F3-6	NEIS2020_1	635	20	new	-	2	3	4	3	8	4	6	11	ST-11
>NZ_CP031332.1 Neisseria meningitidis strain M22814 chromosome, complete genome	X	ctrA	5-1,10-1	F4-23	NEIS2020_509	391	358	0	3042	10	4	15	7	5	41	31	5789	ST-181
>NZ_CP031324.1 Neisseria meningitidis strain M23347 chromosome, complete genome	B	ctrA	19-2,13	F5-5	NEIS2020_46	47	118	0	282	12	5	12	35	60	22	17	461	ST-461
>NZ_CP031326.1 Neisseria meningitidis strain M21374 chromosome, complete genome	C	ctrA	5-1,10-8	F3-6	NEIS2020_1	10	20	new	-	2	3	4	3	8	4	6	11	ST-11
>NZ_CP031327.1 Neisseria meningitidis strain M27477 chromosome	C	ctrA	5-1,10-8	F3-6	NEIS2020_1	4	20	new	-	2	3	4	3	8	4	6	11	ST-11
>NZ_CP031328.1 Neisseria meningitidis strain M18755 chromosome, complete genome	B	ctrA	7-12,14	F1-7	NEIS2020_42	13	20	0	614	8	105	52	4	9	11	7	7303	ST-1572
>NZ_CP031329.1 Neisseria meningitidis strain M22425 chromosome, complete genome	C	ctrA	22,14-6	F4-1	NEIS2020_43	0	228	0	-	47	3	58	433	21	59	8	8798	new
>NZ_CP031330.1 Neisseria meningitidis strain M21955 chromosome, complete genome	C	ctrA	7,16	F3-3	NEIS2020_67	1	5	1	77	4	10	5	4	6	3	8	32	ST-32
>NZ_CP031333.1 Neisseria meningitidis strain M18727 chromosome, complete genome	B	ctrA	19-1,15-11	F5-9	NEIS2020_199	143	0	0	-	4	10	15	9	8	11	17	283	ST-269
>NZ_CP021517.1 Neisseria meningitidis strain 12-221 chromosome, complete genome	Y	ctrA	5-2,10-1	F4-1	NEIS2020_67	25	7	0	228	10	5	18	9	11	9	17	23	ST-23
>NZ_CP021516.1 Neisseria meningitidis strain 14-563 chromosome, complete genome	Y	ctrA	5-2,10-1	F4-1	NEIS2020_67	25	7	0	228	10	5	18	9	11	9	17	23	ST-23
>NZ_CP021518.1 Neisseria meningitidis strain 12-176 chromosome, complete genome	Y	ctrA	5-2,10-85	F4-1	NEIS2020_67	25	7	0	1206	10	5	18	9	11	9	17	23	ST-23
>NZ_CP021519.1 Neisseria meningitidis strain 11-14 chromosome, complete genome	Y	ctrA	5-2,10-1	F4-1	NEIS2020_262	25	7	0	228	10	5	18	9	11	9	17	23	ST-23
>NZ_CP021520.1 Neisseria meningitidis strain 11-7 chromosome, complete genome	Y	ctrA	5-2,10-1	F4-1	NEIS2020_67	25	7	0	228	10	5	18	9	11	9	17	23	ST-23
>NZ_CP021521.1 Neisseria meningitidis strain 09-292 chromosome, complete genome	Y	ctrA	5-1,2-2	F5-8	NEIS2020_243	25	8	0	227	10	5	18	9	11	9	12	4183	ST-23
>NZ_CP021522.1 Neisseria meningitidis strain 06-178 chromosome, complete genome	Y	ctrA	5-2,10-1	F4-1	NEIS2020_67	25	7	0	228	10	5	18	9	11	9	17	23	ST-23
>NZ_CP021523.1 Neisseria meningitidis strain 98-182 chromosome, complete genome	Y	ctrA	5-2,10-1	F4-1	NEIS2020_67	218	7	0	1292	10	5	18	9	11	9	17	23	ST-23
>NZ_CP021725.1 Neisseria meningitidis strain 95-134 chromosome, complete genome	Y	ctrA	5-2,10-1	F4-1	NEIS2020_67	25	7	0	228	10	5	18	9	11	9	17	23	ST-23
>NZ_CP021724.1 Neisseria meningitidis strain 12-330 chromosome, complete genome	Y	ctrA	5-2,10-1	F4-1	NEIS2020_67	25	7	0	228	10	5	18	9	11	9	17	23	ST-23
>NZ_CP021723.1 Neisseria meningitidis strain 13-600 chromosome, complete genome	Y	ctrA	5-2,10-1	F4-1	NEIS2020_67	25	7	0	228	10	5	18	9	11	9	17	23	ST-23
>NZ_CP045960.1 Neisseria meningitidis strain AUSMDU00005726 chromosome, complete genome	Y	ctrA	5-1,10-1	F4-1	NEIS2020_262	25	7	0	221	12	5	18	9	11	9	17	1655	ST-23
>NZ_CP045961.1 Neisseria meningitidis strain AUSMDU00010537 chromosome, complete genome	W	ctrA	5,2	F1-1	NEIS2020_244	22	29	6	2	2	3	4	3	8	4	6	11	ST-11
>NZ_CP060280.1 Neisseria meningitidis strain LNP24198 chromosome, complete genome	C	ctrA	7-1,1	F3-6	new	513	20	new	-	2	3	4	3	8	4	6	11	ST-11
>NZ_CP030814.1 Neisseria meningitidis strain 16-579 chromosome, complete genome	W	ctrA	5,2	F1-1	NEIS2020_244	22	29	6	2	2	3	4	3	8	4	6	11	ST-11
>NZ_CP030816.1 Neisseria meningitidis strain 16-92 chromosome, complete genome	W	ctrA	5,2	F1-1	NEIS2020_244	22	29	6	2	2	3	4	3	8	4	6	11	ST-11
>NZ_CP030818.1 Neisseria meningitidis strain 15-236 chromosome, complete genome	W	ctrA	5,2	F1-1	NEIS2020_244	22	new	6	-	2	3	4	3	8	4	6	11	ST-11
>NZ_CP030819.1 Neisseria meningitidis strain 15-215 chromosome, complete genome	W	ctrA	5,2	F1-1	NEIS2020_244	22	29	6	2	2	3	4	3	8	4	6	11	ST-11
>NZ_CP030820.1 Neisseria meningitidis strain 15-198 chromosome, complete genome	W	ctrA	5,2	F1-1	NEIS2020_244	22	29	6	2	2	3	4	3	8	4	6	11	ST-11
>NZ_CP030823.1 Neisseria meningitidis strain 14-627 chromosome, complete genome	W	ctrA	5,2	F1-1	NEIS2020_244	22	29	6	2	2	3	4	3	8	4	6	11	ST-11
>NZ_CP030825.1 Neisseria meningitidis strain 12-208 chromosome, complete genome	W	ctrA	5,2	F1-1	NEIS2020_244	22	947	6	2139	2	3	4	3	8	4	6	11	ST-11
>NZ_CP030826.1 Neisseria meningitidis strain 11-251 chromosome, complete genome	W	ctrA	5,2	F1-1	NEIS2020_244	22	29	6	2	2	3	4	17	8	4	6	1287	ST-11
>NZ_CP030822.1 Neisseria meningitidis strain 15-123 chromosome, complete genome	W	ctrA	5,2	F1-1	NEIS2020_1365	22	29	6	2	2	3	4	3	8	4	6	11	ST-11
>NZ_CP065653.1 Neisseria meningitidis strain FDAARGOS_914 chromosome, complete genome	A	ctrA	5-2,10	F1-5	NEIS2020_28	5	29	0	773	1	3	3	1	4	2	3	4	ST-4
>NZ_AP024489.1 Neisseria meningitidis strain NIID777 chromosome, complete genome	B	ctrA	22,14-3	F5-8	NEIS2020_71-like	18	0	0	-	8	5	13	11	6	2	2	2057	new
>NZ_CP077603.1 Neisseria meningitidis strain S4 chromosome, complete genome	C	ctrA	5-1,10-8	F3-6	NEIS2020_1	10	20	new	-	2	3	4	3	8	4	6	11	ST-11
>NZ_CP079941.1 Neisseria meningitidis strain C311 chromosome, complete genome	B	ctrA	7-2,16	F3-3	NEIS2020_10	1	new	1	-	4	10	5	4	6	3	8	32	ST-32
>NZ_LR134525.1 Neisseria meningitidis strain NCTC10025 chromosome 1, complete sequence	A	ctrA	5-2,10	F1-5	NEIS2020_28	5	new	0	-	1	3	3	1	4	2	3	4	ST-4
>NZ_LR134522.1 Neisseria meningitidis strain NCTC3372 chromosome 1, complete sequence	A	ctrA	5-2,10	F1-5	NEIS2020_28	5	29	0	773	1	3	3	1	4	2	3	4	ST-4
>NZ_LR134528.1 Neisseria meningitidis strain NCTC12163 chromosome 1, complete sequence	A	ctrA	5-2,10	F5-1	NEIS2020_31	4	29	0	636	1	3	1	1	1	1	3	1	ST-1
>NZ_LR134526.1 Neisseria meningitidis strain NCTC10026 chromosome 1, complete sequence	B	ctrA	-	F4-1	NEIS2020_1461	97	21	0	-	15	5	9	13	8	15	15	2875	ST-4240/6688
