# Supplementary material for: Pangenome graphs in infectious disease: a comprehensive genetic variation analysis of Neisseria meningitidis leveraging Oxford Nanopore long reads
Source: Front Genet. 2023 Aug 10;14:1225248. doi: 10.3389/fgene.2023.1225248 (PMC10448961; doi:10.3389/fgene.2023.1225248)
Supplement: Supplementary file 7 [file Table5.XLSX]

## Sheet: Table S5
Table S5. Mapping rate of the simulated NGS data to single linear reference versus pangenome graph
Simulated NGS	ST42 as reference	ST42Sim as reference	ST41Sim as reference	ST154Sim as reference	4SimGraph
ST42_2k_1_2k_2k	1	1	0.9942	0.9995	1
ST42_2k_1_2k	1	1	0.9944	0.9995	1
ST42_2k_1	1	1	0.9944	0.9996	1
ST42_2k_2_2k_2k	1	1	0.9943	0.9995	1
ST42_2k_2_2k	1	1	0.9944	0.9995	1
ST42_2k_2	1	1	0.9946	0.9995	1
ST42_2k_3_2k_2k	1	1	0.9943	0.9995	1
ST42_2k_3_2k	1	1	0.9944	0.9995	1
ST42_2k_3	1	1	0.9945	0.9996	1
ST42_2k_4_2k_2k	1	1	0.9941	0.9995	1
ST42_2k_4_2k	1	1	0.9942	0.9995	1
ST42_2k_4	1	1	0.9944	0.9995	1
ST42_2k_5_2k_2k	1	1	0.9943	0.9995	1
ST42_2k_5_2k	1	1	0.9944	0.9995	1
ST42_2k_5	1	1	0.9945	0.9995	1
ST42	1	1	0.9947	0.9995	1
ST42Sim_2k_1_2k_2k	1	1	0.9941	0.9993	1
ST42Sim_2k_1_2k	1	1	0.9942	0.9994	1
ST42Sim_2k_1	1	1	0.9943	0.9995	1
ST42Sim_2k_2_2k_2k	1	1	0.9941	0.9993	1
ST42Sim_2k_2_2k	1	1	0.9943	0.9994	1
ST42Sim_2k_2	1	1	0.9943	0.9994	1
ST42Sim_2k_3_2k_2k	1	1	0.9942	0.9993	1
ST42Sim_2k_3_2k	1	1	0.9942	0.9994	1
ST42Sim_2k_3	1	1	0.9943	0.9994	1
ST42Sim_2k_4_2k_2k	1	1	0.994	0.9993	1
ST42Sim_2k_4_2k	1	1	0.9943	0.9993	1
ST42Sim_2k_4	1	1	0.9943	0.9994	1
ST42Sim_2k_5_2k_2k	1	1	0.9942	0.9993	1
ST42Sim_2k_5_2k	1	1	0.9941	0.9994	1
ST42Sim_2k_5	1	1	0.9942	0.9995	1
ST42Sim	1	1	0.9943	0.9995	1
ST41mut_2k_1_2k_2k	0.9997	0.9997	0.9951	0.9995	1
ST41mut_2k_1_2k	0.9997	0.9997	0.995	0.9996	1
ST41mut_2k_1	0.9997	0.9998	0.9951	0.9996	1
ST41mut_2k_2_2k_2k	0.9997	0.9997	0.9952	0.9995	1
ST41mut_2k_2_2k	0.9997	0.9998	0.9952	0.9995	1
ST41mut_2k_2	0.9997	0.9998	0.9952	0.9996	1
ST41mut_2k_3_2k_2k	0.9997	0.9997	0.9951	0.9995	1
ST41mut_2k_3_2k	0.9997	0.9998	0.9953	0.9995	1
ST41mut_2k_3	0.9997	0.9998	0.9952	0.9995	1
ST41mut_2k_4_2k_2k	0.9997	0.9998	0.9951	0.9995	1
ST41mut_2k_4_2k	0.9997	0.9998	0.9953	0.9995	1
ST41mut_2k_4	0.9998	0.9998	0.9952	0.9995	1
ST41mut_2k_5_2k_2k	0.9997	0.9997	0.9951	0.9994	1
ST41mut_2k_5_2k	0.9997	0.9997	0.9951	0.9995	1
ST41mut_2k_5	0.9997	0.9997	0.9953	0.9995	1
ST41mut	0.9997	0.9998	0.9953	0.9996	1
ST41Sim_2k_1_2k_2k	0.9997	0.9997	0.9951	0.9995	1
ST41Sim_2k_1_2k	0.9997	0.9998	0.9952	0.9995	1
ST41Sim_2k_1	0.9997	0.9998	0.9953	0.9996	1
ST41Sim_2k_2_2k_2k	0.9997	0.9998	0.9952	0.9995	1
ST41Sim_2k_2_2k	0.9997	0.9998	0.9952	0.9995	1
ST41Sim_2k_2	0.9998	0.9998	0.9952	0.9996	1
ST41Sim_2k_3_2k_2k	0.9997	0.9997	0.9951	0.9995	1
ST41Sim_2k_3_2k	0.9997	0.9998	0.9951	0.9996	1
ST41Sim_2k_3	0.9997	0.9998	0.9952	0.9996	1
ST41Sim_2k_4_2k_2k	0.9997	0.9997	0.9949	0.9995	1
ST41Sim_2k_4_2k	0.9997	0.9998	0.9952	0.9995	1
ST41Sim_2k_4	0.9997	0.9998	0.9952	0.9995	1
ST41Sim_2k_5_2k_2k	0.9997	0.9997	0.9952	0.9995	1
ST41Sim_2k_5_2k	0.9997	0.9998	0.9951	0.9995	1
ST41Sim_2k_5	0.9997	0.9998	0.9952	0.9996	1
ST41Sim	0.9997	0.9998	0.9952	0.9996	1
ST41_2k_1_2k_2k	0.9978	0.9979	1	0.9981	1
ST41_2k_1_2k	0.9978	0.9979	1	0.9981	1
ST41_2k_1	0.9979	0.998	1	0.9982	1
ST41_2k_2_2k_2k	0.9977	0.9978	1	0.998	1
ST41_2k_2_2k	0.9977	0.9979	1	0.998	1
ST41_2k_2	0.9979	0.998	1	0.9981	1
ST41_2k_3_2k_2k	0.9976	0.9978	1	0.9979	1
ST41_2k_3_2k	0.9977	0.9978	1	0.998	1
ST41_2k_3	0.9978	0.998	1	0.9981	1
ST41_2k_4_2k_2k	0.9978	0.998	1	0.9981	1
ST41_2k_4_2k	0.9977	0.9979	1	0.9981	1
ST41_2k_4	0.9978	0.998	1	0.9981	1
ST41_2k_5_2k_2k	0.9978	0.998	1	0.998	1
ST41_2k_5_2k	0.9977	0.9979	1	0.998	1
ST41_2k_5	0.9979	0.9981	1	0.9982	1
ST41	0.9979	0.998	1	0.9981	1
ST154Sim_2k_1_2k_2k	0.9993	0.9994	0.9943	1	1
ST154Sim_2k_1_2k	0.9994	0.9995	0.9945	1	1
ST154Sim_2k_1	0.9994	0.9995	0.9946	1	1
ST154Sim_2k_2_2k_2k	0.9993	0.9995	0.9945	1	1
ST154Sim_2k_2_2k	0.9994	0.9995	0.9945	1	1
ST154Sim_2k_2	0.9994	0.9995	0.9945	1	1
ST154Sim_2k_3_2k_2k	0.9993	0.9994	0.9944	1	1
ST154Sim_2k_3_2k	0.9994	0.9995	0.9945	1	1
ST154Sim_2k_3	0.9994	0.9995	0.9946	1	1
ST154Sim_2k_4_2k_2k	0.9993	0.9994	0.9944	1	1
ST154Sim_2k_4_2k	0.9993	0.9994	0.9945	1	1
ST154Sim_2k_4	0.9993	0.9995	0.9946	1	1
ST154Sim_2k_5_2k_2k	0.9993	0.9994	0.9944	1	1
ST154Sim_2k_5_2k	0.9994	0.9995	0.9946	1	1
ST154Sim_2k_5	0.9994	0.9995	0.9946	1	1
ST154Sim	0.9994	0.9996	0.9947	1	1
ST154_2k_1_2k_2k	0.9963	0.9965	0.9949	0.9976	1
ST154_2k_1_2k	0.9964	0.9966	0.995	0.9977	1
ST154_2k_1	0.9966	0.9967	0.9951	0.9977	1
ST154_2k_2_2k_2k	0.9962	0.9965	0.9949	0.9976	1
ST154_2k_2_2k	0.9963	0.9965	0.9948	0.9976	1
ST154_2k_2	0.9965	0.9967	0.9951	0.9976	1
ST154_2k_3_2k_2k	0.9962	0.9965	0.9949	0.9977	1
ST154_2k_3_2k	0.9964	0.9967	0.995	0.9978	1
ST154_2k_3	0.9966	0.9968	0.9952	0.9978	1
ST154_2k_4_2k_2k	0.9963	0.9965	0.9949	0.9976	1
ST154_2k_4_2k	0.9964	0.9966	0.9951	0.9977	1
ST154_2k_4	0.9965	0.9967	0.995	0.9976	1
ST154_2k_5_2k_2k	0.9961	0.9964	0.9948	0.9976	1
ST154_2k_5_2k	0.9964	0.9966	0.9949	0.9976	1
ST154_2k_5	0.9964	0.9967	0.995	0.9977	1
ST154	0.9965	0.9967	0.9951	0.9977	1
ST154Mut_2k_1_2k_2k	0.9994	0.9995	0.9945	1	1
ST154Mut_2k_1_2k	0.9994	0.9995	0.9944	1	1
ST154Mut_2k_1	0.9994	0.9995	0.9946	1	1
ST154Mut_2k_2_2k_2k	0.9993	0.9995	0.9944	1	1
ST154Mut_2k_2_2k	0.9994	0.9995	0.9945	1	1
ST154Mut_2k_2	0.9995	0.9996	0.9945	1	1
ST154Mut_2k_3_2k_2k	0.9993	0.9994	0.9945	1	1
ST154Mut_2k_3_2k	0.9993	0.9995	0.9944	1	1
ST154Mut_2k_3	0.9995	0.9996	0.9946	1	1
ST154Mut_2k_4_2k_2k	0.9993	0.9995	0.9944	1	1
ST154Mut_2k_4_2k	0.9994	0.9995	0.9946	1	1
ST154Mut_2k_4	0.9994	0.9995	0.9944	1	1
ST154Mut_2k_5_2k_2k	0.9992	0.9994	0.9943	1	1
ST154Mut_2k_5_2k	0.9993	0.9994	0.9944	1	1
ST154Mut_2k_5	0.9994	0.9995	0.9945	1	1
ST154Mut	0.9994	0.9995	0.9946	1	1
count	128	128	128	128	128
mean	0.99879	0.99849	0.994889	0.999257	1
std	0.001084	0.001215	0.000592	0.000217	0
min	0.9961	0.9964	0.994	0.9976	1
0.25	0.9977	0.9978	0.9944	0.9995	1
0.5	0.9994	0.9995	0.99455	0.9995	1
0.75	0.9994	0.9995	0.9951	0.9996	1
max	1	0.9998	1	1	1
Note that _2k and _1 reflect the simulation process. For example, ST42_2k_1 is the first simulation of ST42 with 2k SNPs, while in ST42_2k_1_2k, an additional 2k SNPs are being simulated.
